# Supplementary material
Source: publisher figshare collection journal article supplement (https://sage.figshare.com/ndownloader/files/17961677)
Supplement: Supplementary file 1 [file 17961677]

## Supplemental Appendix: Sample Survey Questions

### Feeding Information About Your Baby With A Cleft

1. Prior to the birth of your baby, did you plan to feed your baby directly at breast?
  - a) Yes
  - b) No
  - c) Unsure
  
2. How did you feel about the idea of feeding your baby at breast prior to giving birth? (Please select all that apply)
  - a) Afraid
  - b) Confident
  - c) Confused
  - d) Discouraged
  - e) Eager
  - f) Excited
  - g) Happy
  - h) Indifferent
  - i) Scared
  - j) Worried
  
3. What did you know about the benefits of breastfeeding or providing breast milk via bottle prior to giving birth? (Please select all that apply)
  - a) Benefits to baby's brain
  - b) Immune benefits to baby
  - c) Decreases risk of Sudden Infant Death Syndrome (SIDS)
  - d) Lowers risk of babies developing allergies
  - e) Lowers risk of asthma in babies
  - f) Decreases risk of ear infections
  - g) Helps mothers lose pregnancy weight
  - h) Lowers risk of breast and ovarian cancer in mothers
  - i) Other
  
4. Who provided you information about feeding your baby at breast prior to your baby's birth? (Please select all that apply)
  - a) Lactation consultant/specialist
  - b) Nurse (not a lactation consultant/specialist)
  - c) Physician
  - d) Feeding therapist (occupational or speech)
  - e) Friends
  - f) Family
  - g) Organized breastfeeding support group
  - h) Online peer support (e.g., BabyCenter blogs, Facebook groups)
  - i) Other online resources
  - j) No one provided me with information

5. What did you know or hear about directly feeding a baby with a cleft at breast when you learned about your baby's diagnosis?

- a) That it would be difficult
- b) That it would be impossible
- c) That it was the only way my baby could feed
- d) That it would hurt
- e) Other

6. Did anyone explain why feeding at breast can be difficult for babies with clefts?

- a) Yes
- b) No

7. Did your decision about how you would feed your baby change after you learned about your child's cleft?

- a) Yes, I was planning to feed at breast until I learned about my child's diagnosis and then decided to bottle feed
- b) Yes, I was planning to bottle feed until I learned about my child's diagnosis and then decided to feed my baby at breast
- c) Yes, I was planning to feed my baby at breast and bottle feed until I learned about my child's diagnoses and then decided to feed my baby by bottle
- d) Yes, I was planning to feed my baby at breast and bottle feed until I learned about my child's diagnoses and then decided to feed my baby at breast
- e) No, I was planning to feed at breast and decided that I would do this regardless of my child's diagnosis
- f) No, I was planning to bottle feed and decided that I would do this regardless of my child's diagnosis
- g) No, I was planning to feed my baby at breast and bottle feed and decided that I would do this regardless of my child's diagnosis

8. Did you ever feed your child with a cleft directly at the breast?

- a) Yes
- b) No

9. How old was your child when you first fed them directly at the breast?

\_\_\_\_\_ Days / Weeks / Months

10. Were you able to successfully feed your baby at breast?

- a) Yes
- b) No

11. What helped you successfully feed your baby at breast?

- a) Hand-expressing milk while my baby was feeding
- b) Positioning my breast tissue into my baby's cleft
- c) Use of a supplemental nursing system
- d) Specific positioning of my baby
- e) No strategies were necessary
- f) Other

12. Are you still feeding your child directly at the breast?

- a) Yes
- b) No

13. How old was your child when you stopped feeding him or her directly at the breast?

\_\_\_\_\_ Days / Weeks / Months
